# Supplementary material for: Assessment of oral health and cost of care for a group of refugees in Germany: a cross-sectional study
Source: Springer Nature journal article supplement (doi:10.1186/s12903-018-0535-1), 2018-04-26
Supplement: MOESM1 [file 15725516]

## Evaluation of oral health status

1. When was the last visit of a dentist? \_\_\_\_\_

---

2. Did you visit a dentist during childhood regular?

- No
- Yes, once per year
- Yes, twice per year
- 

3. How often do you clean (dental hygiene) your teeth per day?

- Never
- once per day
- twice per day
- more than twice per day
- 

4. Was there a time without access to dental hygiene products?

- Yes
- No
- 

5. Have you at the moment toothache?

- Yes
- No

How strong are your toothache? (0 "no pain" to 10 "extremely strong pain")

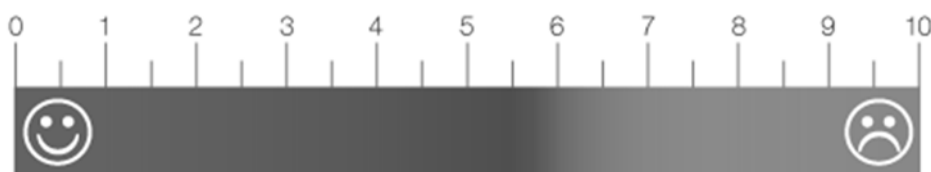

## Dental screening

|                                                                                  |                                                                                   |                                                                                   |                                                                                   |                                                                                   |                                                                                   |                                                                                   |                                                                                   |                                                                                   |                                                                                   |                                                                                    |                                                                                     |                                                                                     |                                                                                     |                                                                                     |                                                                                     |
|----------------------------------------------------------------------------------|-----------------------------------------------------------------------------------|-----------------------------------------------------------------------------------|-----------------------------------------------------------------------------------|-----------------------------------------------------------------------------------|-----------------------------------------------------------------------------------|-----------------------------------------------------------------------------------|-----------------------------------------------------------------------------------|-----------------------------------------------------------------------------------|-----------------------------------------------------------------------------------|------------------------------------------------------------------------------------|-------------------------------------------------------------------------------------|-------------------------------------------------------------------------------------|-------------------------------------------------------------------------------------|-------------------------------------------------------------------------------------|-------------------------------------------------------------------------------------|
|                                                                                  |                                                                                   |                                                                                   |                                                                                   |                                                                                   |                                                                                   |                                                                                   |                                                                                   |                                                                                   |                                                                                   |                                                                                    |                                                                                     |                                                                                     |                                                                                     |                                                                                     |                                                                                     |
|  |  |  |  |  |  |  |  |  |  |  |  |  |  |  |  |
| <b>8</b>                                                                         | <b>7</b>                                                                          | <b>6</b>                                                                          | <b>5</b>                                                                          | <b>4</b>                                                                          | <b>3</b>                                                                          | <b>2</b>                                                                          | <b>1</b>                                                                          | <b>1</b>                                                                          | <b>2</b>                                                                          | <b>3</b>                                                                           | <b>4</b>                                                                            | <b>5</b>                                                                            | <b>6</b>                                                                            | <b>7</b>                                                                            | <b>8</b>                                                                            |
|  |  |  |  |  |  |  |  |  |  |  |  |  |  |  |  |
|                                                                                  |                                                                                   |                                                                                   |                                                                                   |                                                                                   |                                                                                   |                                                                                   |                                                                                   |                                                                                   |                                                                                   |                                                                                    |                                                                                     |                                                                                     |                                                                                     |                                                                                     |                                                                                     |

|           |                   |           |                        |
|-----------|-------------------|-----------|------------------------|
| <b>F</b>  | Filled            | <b>C</b>  | Decayed tooth (caries) |
| <b>K</b>  | Crown             | <b>F</b>  | Missing tooth          |
| <b>B</b>  | Bridge element    | <b>X</b>  | Destroyed tooth        |
| <b>TK</b> | Crown (partial)   | <b>WF</b> | Root canal filling     |
| <b>I</b>  | Implantat         |           |                        |
| <b>E</b>  | Tooth replacement |           |                        |
